# Supplementary material for: Stability Evaluation of the Goaf Based on Combination Weighting and Cloud Model
Source: Hindawi journal article supplement (doi:10.1155/2024/3884586), 2024-01-01
Supplement: f1 [file 3884586.f1.docx]

**Supporting Information**

Stability Evaluation of the Goaf Based on combination Weighting and Cloud Model

Linning Guo,1,2* Kepeng Hou,1,2

*1* *Department of Resource Development Engineering, Kunming University of Science and Technology, Kunming, /650000, China.（*[*guo@stu.kust.edu.cn*](mailto:guo@stu.kust.edu.cn)*）
2* *Yunnan Key Laboratory of Sino-German Blue Mining and Utilization of Special Underground Space, Kunming University of Science and Technology, Kunming, /650000, China.*

A total of 10 decision makers from D1 to D10 made back-to-back comparisons of 13 factors affecting the stability of the goaf. Their judgment matrices are shown in the following tables S1 ~ S10.

**Table S1 Judgment matrix of decision maker D1**

| Clustering comparison matrix | |
| --- | --- |
| | U | U1 | U2 | U3 | U4 | | --- | --- | --- | --- | --- | | U1 | 1 | 1/2 | 4 | 3 | | U2 | 2 | 1 | 5 | 4 | | U3 | 1/4 | 1/5 | 1 | 1/2 | | U4 | 1/3 | 1/4 | 2 | 1 | | |
| Geological factors comparison matrix(X1~X4) | |
| | U1 | U11 | U12 | U13 | U14 | | --- | --- | --- | --- | --- | | U11 | 1 | 1 | 1 | 2 | | U12 | 1 | 1 | 2 | 2 | | U13 | 1 | 1/2 | 1 | 2 | | U14 | 1/2 | 1/2 | 1/2 | 1 | | |
| Structural parameters of the mined-out area(X5~X10) | |
| | U2 | U21 | U22 | U23 | U24 | U25 | U26 | | --- | --- | --- | --- | --- | --- | --- | | U21 | 1 | 1 | 1 | 1/2 | 2 | 2 | | U22 | 1 | 1 | 1 | 1/2 | 2 | 2 | | U23 | 1 | 1 | 1 | 1/2 | 2 | 2 | | U24 | 2 | 2 | 2 | 1 | 2 | 2 | | U25 | 1/2 | 1/2 | 1/2 | 1/2 | 1 | 2 | | U26 | 1/2 | 1/2 | 1/2 | 1/2 | 1/2 | 1 | | |
| Hydrological factors(X11) | Engineering Influence Factors(X11~X12) |
| | U3 | U31 | | --- | --- | | U31 | 1 | | | U4 |  | | --- | --- | | U41 | 0.5 | | U42 | 0.5 | |

**Table S2 Judgment matrix of decision maker D2**

| Clustering comparison matrix | |
| --- | --- |
| | U | U1 | U2 | U3 | U4 | | --- | --- | --- | --- | --- | | U1 | 1 | 1 | 4 | 3 | | U2 | 1 | 1 | 4 | 3 | | U3 | 1/4 | 1/4 | 1 | 1/2 | | U4 | 1/3 | 1/3 | 2 | 1 | | |
| Geological factors comparison matrix(X1~X4) | |
| | U1 | U11 | U12 | U13 | U14 | | --- | --- | --- | --- | --- | | U11 | 1 | 1 | 1 | 2 | | U12 | 1 | 1 | 2 | 2 | | U13 | 1 | 1/2 | 1 | 2 | | U14 | 1/2 | 1/2 | 1/2 | 1 | | |
| Structural parameters of the mined-out area(X5~X10) | |
| | U2 | U21 | U22 | U23 | U24 | U25 | U26 | | --- | --- | --- | --- | --- | --- | --- | | U21 | 1 | 1 | 1 | 1 | 1 | 2 | | U22 | 1 | 1 | 1 | 1 | 1 | 2 | | U23 | 1 | 1 | 1 | 1 | 1 | 2 | | U24 | 1 | 1 | 1 | 1 | 2 | 2 | | U25 | 1 | 1 | 1 | 1/2 | 1 | 2 | | U26 | 1/2 | 1/2 | 1/2 | 1/2 | 1/2 | 1 | | |
| Hydrological factors(X11) | Engineering Influence Factors(X11~X12) |
| | U3 | U31 | | --- | --- | | U31 | 1 | | | U4 |  | | --- | --- | | U41 | 0.6 | | U42 | 0.4 | |

**Table S3 Judgment matrix of decision maker D3**

| Clustering comparison matrix | |
| --- | --- |
| | U | U1 | U2 | U3 | U4 | | --- | --- | --- | --- | --- | | U1 | 1 | 1 | 4 | 3 | | U2 | 1 | 1 | 4 | 3 | | U3 | 1/4 | 1/4 | 1 | 1/2 | | U4 | 1/3 | 1/3 | 2 | 1 | | |
| Geological factors comparison matrix(X1~X4) | |
| | U1 | U11 | U12 | U13 | U14 | | --- | --- | --- | --- | --- | | U11 | 1 | 1 | 1 | 1 | | U12 | 1 | 1 | 1 | 2 | | U13 | 1 | 1 | 1 | 1 | | U14 | 1 | 1/2 | 1 | 1 | | |
| Structural parameters of the mined-out area(X5~X10) | |
| | U2 | U21 | U22 | U23 | U24 | U25 | U26 | | --- | --- | --- | --- | --- | --- | --- | | U21 | 1 | 1 | 1 | 1/2 | 2 | 2 | | U22 | 1 | 1 | 1 | 1/2 | 2 | 2 | | U23 | 1 | 1 | 1 | 1/2 | 2 | 2 | | U24 | 2 | 2 | 2 | 1 | 2 | 2 | | U25 | 1/2 | 1/2 | 1/2 | 1/2 | 1 | 2 | | U26 | 1/2 | 1/2 | 1/2 | 1/2 | 1/2 | 1 | | |
| Hydrological factors(X11) | Engineering Influence Factors(X11~X12) |
| | U3 | U31 | | --- | --- | | U31 | 1 | | | U4 |  | | --- | --- | | U41 | 0.4 | | U42 | 0.6 | |

**Table S4 Judgment matrix of decision maker D4**

| Clustering comparison matrix | |
| --- | --- |
| | U | U1 | U2 | U3 | U4 | | --- | --- | --- | --- | --- | | U1 | 1 | 1/2 | 5 | 2 | | U2 | 2 | 1 | 6 | 2 | | U3 | 1/5 | 1/6 | 1 | 1/2 | | U4 | 1/2 | 1/2 | 2 | 1 | | |
| Geological factors comparison matrix(X1~X4) | |
| | U1 | U11 | U12 | U13 | U14 | | --- | --- | --- | --- | --- | | U11 | 1 | 2 | 2 | 2 | | U12 | 1/2 | 1 | 2 | 2 | | U13 | 1/2 | 1/2 | 1 | 2 | | U14 | 1/2 | 1/2 | 1/2 | 1 | | |
| Structural parameters of the mined-out area(X5~X10) | |
| | U2 | U21 | U22 | U23 | U24 | U25 | U26 | | --- | --- | --- | --- | --- | --- | --- | | U21 | 1 | 1 | 1 | 1 | 1 | 3 | | U22 | 1 | 1 | 1 | 1 | 1 | 2 | | U23 | 1 | 1 | 1 | 1 | 1 | 2 | | U24 | 1 | 1 | 1 | 1 | 1 | 2 | | U25 | 1 | 1 | 1 | 1 | 1 | 2 | | U26 | 1/3 | 1/2 | 1/2 | 1/2 | 1/2 | 1 | | |
| Hydrological factors(X11) | Engineering Influence Factors(X11~X12) |
| | U3 | U31 | | --- | --- | | U31 | 1 | | | U4 |  | | --- | --- | | U41 | 0.5 | | U42 | 0.5 | |

**Table S5 Judgment matrix of decision maker D5**

| Clustering comparison matrix | |
| --- | --- |
| | U | U1 | U2 | U3 | U4 | | --- | --- | --- | --- | --- | | U1 | 1 | 1 | 4 | 3 | | U2 | 1 | 1 | 4 | 3 | | U3 | 1/4 | 1/4 | 1 | 1/2 | | U4 | 1/3 | 1/3 | 2 | 1 | | |
| Geological factors comparison matrix(X1~X4) | |
| | U1 | U11 | U12 | U13 | U14 | | --- | --- | --- | --- | --- | | U11 | 1 | 1 | 1 | 1 | | U12 | 1 | 1 | 1 | 1 | | U13 | 1 | 1 | 1 | 1 | | U14 | 1 | 1 | 1 | 1 | | |
| Structural parameters of the mined-out area(X5~X10) | |
| | U2 | U21 | U22 | U23 | U24 | U25 | U26 | | --- | --- | --- | --- | --- | --- | --- | | U21 | 1 | 1 | 1 | 2 | 2 | 2 | | U22 | 1 | 1 | 1 | 1/2 | 3 | 3 | | U23 | 1 | 1 | 1 | 1 | 2 | 2 | | U24 | 1/2 | 2 | 1 | 1 | 3 | 3 | | U25 | 1/2 | 1/3 | 1/2 | 1/3 | 1 | 2 | | U26 | 1/2 | 1/3 | 1/2 | 1/3 | 1/2 | 1 | | |
| Hydrological factors(X11) | Engineering Influence Factors(X11~X12) |
| | U3 | U31 | | --- | --- | | U31 | 1 | | | U4 |  | | --- | --- | | U41 | 0.6 | | U42 | 0.4 | |

**Table S6 Judgment matrix of decision maker D6**

| Clustering comparison matrix | |
| --- | --- |
| | U | U1 | U2 | U3 | U4 | | --- | --- | --- | --- | --- | | U1 | 1 | 1/2 | 3 | 3 | | U2 | 2 | 1 | 5 | 5 | | U3 | 1/3 | 1/5 | 1 | 1/2 | | U4 | 1/3 | 1/5 | 2 | 1 | | |
| Geological factors comparison matrix(X1~X4) | |
| | U1 | U11 | U12 | U13 | U14 | | --- | --- | --- | --- | --- | | U11 | 1 | 2 | 2 | 2 | | U12 | 1/2 | 1 | 2 | 2 | | U13 | 1/2 | 1/2 | 1 | 1 | | U14 | 1/2 | 1/2 | 1 | 1 | | |
| Structural parameters of the mined-out area(X5~X10) | |
| | U2 | U21 | U22 | U23 | U24 | U25 | U26 | | --- | --- | --- | --- | --- | --- | --- | | U21 | 1 | 1 | 1 | 2 | 2 | 2 | | U22 | 1 | 1 | 2 | 2 | 2 | 2 | | U23 | 1 | 1/2 | 1 | 1 | 1 | 1 | | U24 | 1/2 | 1/2 | 1 | 1 | 1 | 1 | | U25 | 1/2 | 1/2 | 1 | 1 | 1 | 1 | | U26 | 1/2 | 1/2 | 1 | 1 | 1 | 1 | | |
| Hydrological factors(X11) | Engineering Influence Factors(X11~X12) |
| | U3 | U31 | | --- | --- | | U31 | 1 | | | U4 |  | | --- | --- | | U41 | 0.4 | | U42 | 0.6 | |

**Table S7 Judgment matrix of decision maker D7**

| Clustering comparison matrix | |
| --- | --- |
| | U | U1 | U2 | U3 | U4 | | --- | --- | --- | --- | --- | | U1 | 1 | 1 | 4 | 3 | | U2 | 1 | 1 | 6 | 4 | | U3 | 1/4 | 1/6 | 1 | 1/3 | | U4 | 1/3 | 1/4 | 3 | 1 | | |
| Geological factors comparison matrix(X1~X4) | |
| | U1 | U11 | U12 | U13 | U14 | | --- | --- | --- | --- | --- | | U11 | 1 | 2 | 1 | 1 | | U12 | 1/2 | 1 | 1 | 2 | | U13 | 1 | 1 | 1 | 1 | | U14 | 1 | 1/2 | 1 | 1 | | |
| Structural parameters of the mined-out area(X5~X10) | |
| | U2 | U21 | U22 | U23 | U24 | U25 | U26 | | --- | --- | --- | --- | --- | --- | --- | | U21 | 1 | 1 | 1 | 1 | 1 | 2 | | U22 | 1 | 1 | 1 | 1 | 1 | 2 | | U23 | 1 | 1 | 1 | 1 | 2 | 2 | | U24 | 1 | 1 | 1 | 1 | 1 | 1 | | U25 | 1 | 1 | 1/2 | 1 | 1 | 2 | | U26 | 1/2 | 1/2 | 1/2 | 1 | 1/2 | 1 | | |
| Hydrological factors(X11) | Engineering Influence Factors(X11~X12) |
| | U3 | U31 | | --- | --- | | U31 | 1 | | | U4 |  | | --- | --- | | U41 | 0.5 | | U42 | 0.5 | |

**Table S8 Judgment matrix of decision maker D8**

| Clustering comparison matrix | |
| --- | --- |
| | U | U1 | U2 | U3 | U4 | | --- | --- | --- | --- | --- | | U1 | 1 | 1 | 2 | 2 | | U2 | 1 | 1 | 3 | 3 | | U3 | 1/2 | 1/3 | 1 | 1/2 | | U4 | 1/2 | 1/3 | 2 | 1 | | |
| Geological factors comparison matrix(X1~X4) | |
| | U1 | U11 | U12 | U13 | U14 | | --- | --- | --- | --- | --- | | U11 | 1 | 1 | 1 | 2 | | U12 | 1 | 1 | 2 | 2 | | U13 | 1 | 1/2 | 1 | 2 | | U14 | 1/2 | 1/2 | 1/2 | 1 | | |
| Structural parameters of the mined-out area(X5~X10) | |
| | U2 | U21 | U22 | U23 | U24 | U25 | U26 | | --- | --- | --- | --- | --- | --- | --- | | U21 | 1 | 1 | 1 | 1 | 1 | 2 | | U22 | 1 | 1 | 1 | 1 | 2 | 2 | | U23 | 1 | 1 | 1 | 1 | 1 | 2 | | U24 | 1 | 1 | 1 | 1 | 1 | 3 | | U25 | 1 | 1/2 | 1 | 1 | 1 | 2 | | U26 | 1/2 | 1/2 | 1/2 | 1/3 | 1/2 | 1 | | |
| Hydrological factors(X11) | Engineering Influence Factors(X11~X12) |
| | U3 | U31 | | --- | --- | | U31 | 1 | | | U4 |  | | --- | --- | | U41 | 0.6 | | U42 | 0.4 | |

**Table S9 Judgment matrix of decision maker D9**

| Clustering comparison matrix | |
| --- | --- |
| | U | U1 | U2 | U3 | U4 | | --- | --- | --- | --- | --- | | U1 | 1 | 1/2 | 2 | 2 | | U2 | 2 | 1 | 5 | 5 | | U3 | 1/2 | 1/5 | 1 | 1/3 | | U4 | 1/2 | 1/5 | 3 | 1 | | |
| Geological factors comparison matrix(X1~X4) | |
| | U1 | U11 | U12 | U13 | U14 | | --- | --- | --- | --- | --- | | U11 | 1 | 1 | 1 | 1 | | U12 | 1 | 1 | 1 | 3 | | U13 | 1 | 1 | 1 | 2 | | U14 | 1 | 1/3 | 1/2 | 1 | | |
| Structural parameters of the mined-out area(X5~X10) | |
| | U2 | U21 | U22 | U23 | U24 | U25 | U26 | | --- | --- | --- | --- | --- | --- | --- | | U21 | 1 | 1 | 1 | 1/2 | 2 | 2 | | U22 | 1 | 1 | 1 | 1 | 1 | 3 | | U23 | 1 | 1 | 1 | 1/2 | 2 | 2 | | U24 | 2 | 1 | 2 | 1 | 1 | 3 | | U25 | 1/2 | 1 | 1/2 | 1 | 1 | 2 | | U26 | 1/2 | 1/3 | 1/2 | 1/3 | 1/2 | 1 | | |
| Hydrological factors(X11) | Engineering Influence Factors(X11~X12) |
| | U3 | U31 | | --- | --- | | U31 | 1 | | | U4 |  | | --- | --- | | U41 | 0.4 | | U42 | 0.6 | |

**Table S10 Judgment matrix of decision maker D10**

| Clustering comparison matrix | |
| --- | --- |
| | U | U1 | U2 | U3 | U4 | | --- | --- | --- | --- | --- | | U1 | 1 | 1/3 | 4 | 3 | | U2 | 3 | 1 | 6 | 4 | | U3 | 1/4 | 1/6 | 1 | 2/5 | | U4 | 1/3 | 1/4 | 2 1/2 | 1 | | |
| Geological factors comparison matrix(X1~X4) | |
| | U | U11 | U12 | U13 | U14 | | --- | --- | --- | --- | --- | | U11 | 1 | 1 | 1 | 2 | | U12 | 1 | 1 | 2 | 3 | | U13 | 1 | 1/2 | 1 | 2 | | U14 | 1/2 | 1/3 | 1/2 | 1 | | |
| Structural parameters of the mined-out area(X5~X10) | |
| | U2 | U21 | U22 | U23 | U24 | U25 | U26 | | --- | --- | --- | --- | --- | --- | --- | | U21 | 1 | 1 | 1 | 1 | 2 | 2 | | U22 | 1 | 1 | 1 | 1 | 2 | 2 | | U23 | 1 | 1 | 1 | 1/2 | 2 | 2 | | U24 | 1 | 1 | 2 | 1 | 3 | 3 | | U25 | 1/2 | 1/2 | 1/2 | 1/3 | 1 | 1 | | U26 | 1/2 | 1/2 | 1/2 | 1/3 | 1 | 1 | | |
| Hydrological factors(X11) | Engineering Influence Factors(X11~X12) |
| | U3 | U31 | | --- | --- | | U31 | 1 | | | U4 |  | | --- | --- | | U41 | 0.5 | | U42 | 0.5 | |
